# Supplementary material for: Fingolimod induces neuroprotective factors in human astrocytes
Source: Springer Nature journal article supplement (doi:10.1186/s12974-015-0393-6), 2015-09-29

**A**

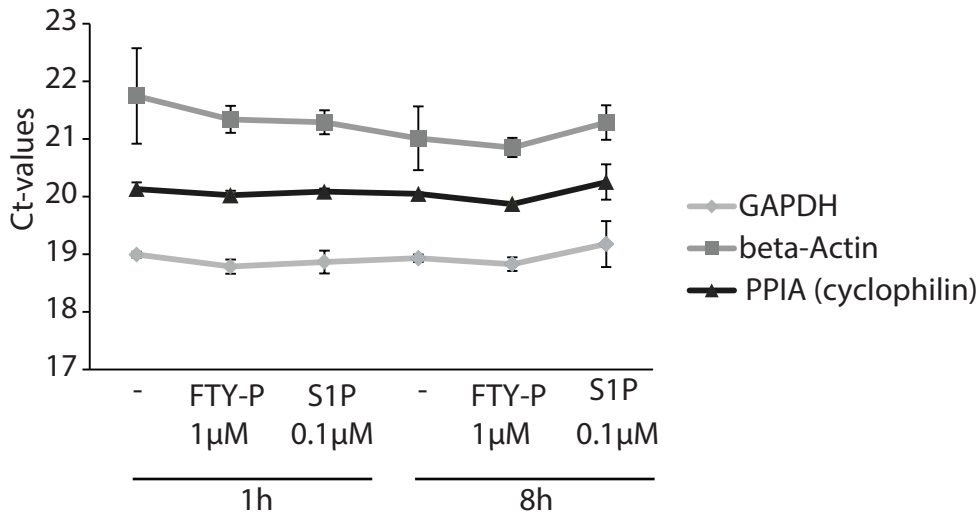

**B**

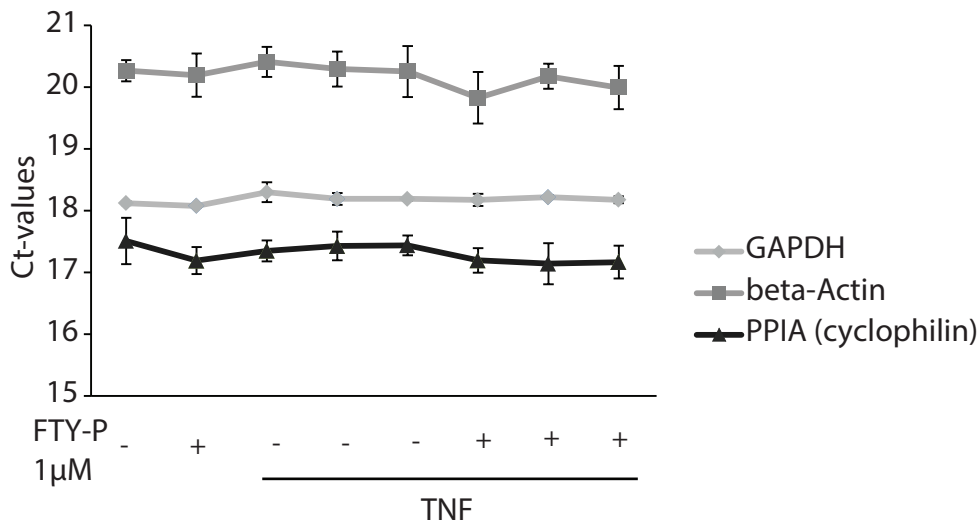

**C**

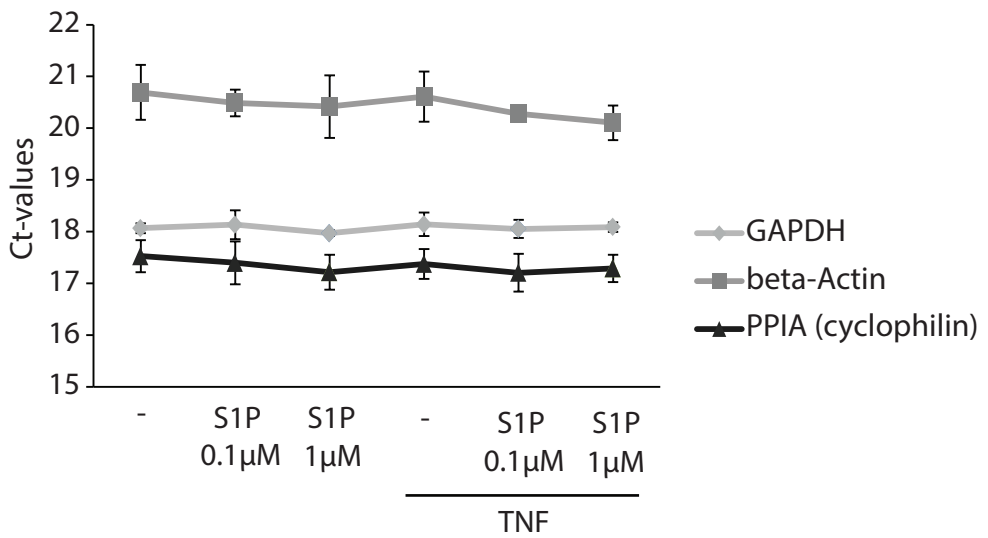

Supplement: MOESM1 [file 9768842]
